# Supplementary material for: Regulation of starvation-induced hyperactivity by insulin and glucagon signaling in adult Drosophila
Source: eLife. 2016 Sep 9;5:e15693. doi: 10.7554/eLife.15693 (PMC5042652; doi:10.7554/eLife.15693)
Supplement: Supplementary file 1. — (A) Baseline locomotion for Figure 1 Summary of our RNAi screen (n = 29–48). For each line, their average daily midline crossing activity when fed ad libitum with 5% sucrose ('Baseline locomotion') was listed. The statistical difference between each RNAi line vs. the Control strain was listed. 'Control' is the progeny of the elav-GAL4 driver line crossed to a wild type strain. Data are shown as means ( ± SEM). NS, p>0.05; *p<0.05; **p<0.01; ***p<0.001. (B) Primers for Figure 6a–b List of candidate neuropeptide receptor genes, their putative ligands, and the primers used for RT-PCR analysis shown in Figure 6a–b. (C). Primers for Figure 7a–b List of candidate neurotransmitter related genes and the primers used for RT-PCR analysis shown in Figure 7a–b. DOI: http://dx.doi.org/10.7554/eLife.15693.019 [file elife-15693-supp1.xlsx]

## Sheet: Baseline locom. for Figure 1
Gene name	Gene ID	Baseline locomotion (fed)	Statistical significance from Control
Control		865.2(±33.9)
Adipokinetic hormone receptor	CG11325	773.9(±39.0)	NS
CCHamide-1 receptor	CG30106	940.9(±76.9)	NS
Neuropeptide F receptor	CG1147	1003.0(±44.3)	*
Leucine-rich repeat-containing G protein-coupled receptor 1	CG7665	744.1(±38.9)	*
Diuretic hormone 44 receptor 1	CG8422	719.1(±42.6)	**
Proctolin receptor	CG6986	734.2(±37.3)	*
Allatostatin C receptor 2	CG13702	766.1(±69.7)	NS
Cholecystokinin-like receptor at 17D1	CG42301	706.3(±39.7)	**
	CG10738	686.3(±49.6)	**
Rickets	CG8930	806.1(±66.4)	NS
Leucokinin receptor	CG10626	769.6(±43.1)	NS
Tachykinin-like receptor at 99D	CG7887	783.3(±58.9)	NS
Pyrokinin 1 receptor	CG9918	614.8(±29.9)	***
SIFamide receptor	CG10823	516.3(±31.1)	***
Myosuppressin receptor 1	CG8985	758.7(±43.3)	NS
Allatostatin C receptor 1	CG7285	855.2(±30.2)	NS
Corazonin receptor	CG10698	803.3(±32.3)	NS
FMRFamide receptor	CG2114	735.8(±38.6)	*
Pyrokinin 2 receptor 1	CG8784	732.0(±41.6)	*
Myosuppressin receptor 2	CG43745	794.1(±42.5)	NS
Allatostatin A receptor 1	CG2872	828.7(±46.9)	NS
Torso	CG1389	723.8(±46.6)	*
Allatostatin A receptor 2	CG10001	679.7(±44.1)	**
Crustacean cardioactive peptide receptor	CG33344	884.3(±61.3)	NS
Capability receptor	CG14575	959.6(±49.1)	NS
Pyrokinin 2 receptor 2	CG8795	648.1(±28.2)	***
Ecdysis-triggering hormone receptor	CG5911	990.3(±55.4)	NS
Pigment-dispersing factor receptor	CG13758	678.3(±27.8)	***
Diuretic hormone 31 Receptor	CG32843	519.3(±50.3)	***
Tachykinin-like receptor at 86C	CG6515	749.3(±43.7)	*
Short neuropeptide F receptor	CG7395	820.0(±49.3)	NS

## Sheet: Primers for Figure 6a-b
Line No.	Gene Name	Gene ID	Forward Primer	Reverse Primer
1	GFP		TCGTGACCACCCTGACCTA	TCACCTTGATGCCGTTCTT
2	Adipokinetic hormone receptor	CG11325	ACTGCTACGGAGCCATTT	TGTCCAGCCAGTACCACA
3	Drosophila insulin-like receptor	CG8167	GCAGCAATGAATGCGACGAT	CCTGCGTCGCTTGTTGAAAA
4	Myosuppressin receptor 2	CG43745	AAAGGAATCGCATCTGGT	CATCTGGCGTTGTACTCG
5	Leucokinin receptor	CG10626	CTACGAGCGGGCATACAA	GCTCCAGTTCCACTTAGGGT
6	Short neuropeptide F receptor	CG7395	TCGGATGAGGATAGGAGCG	CGTGTAAAGCGGAGTAAATGG
7	Tachykinin-like receptor at 86C	CG6515	TGTGAACACCACGCTCCT	AAACATCATCAGACCGAAA
8	Sex peptide receptor	CG16752	GATTTCATCTGCCAACCAA	AACGAGCACAATCAGGGA
9	Rickets	CG8930	CTGCAAACACAAACGGGAGG	CAGAGCAGCACAAACACCAC
10	Pigment-dispersing factor receptor	CG13758	CTCCCTGTTCGCCCTTAT	CCACGGTGACCATGTTGT
11	FMRFamide receptor	CG2114	TTTCCGCAGAACAACAGT	TTCCAAACAGCAGGATAGA
12	Proctolin receptor	CG6986	CAGTTTCGGTTACATCTCAA	GCGTCATCAATCTGCCTA
13	SIFamide receptor	CG10823	GCGGACGGTGACGAACTA	AAGAAGAGCAGCCAAGGAAT
14	Tachykinin-like receptor at 99D	CG7887	CCGTCATTGGCAACACTT	CGATACGAACTTGGTGGG
15	Allatostatin C receptor 2	CG13702	GCAGACCGTAACCAACATA	TCCCAAGACCAGCGAGTA
16	Leucine-rich repeat-containing G protein-coupled receptor 1	CG7665	GTCCGCCTGGAAGTGTTG	AAGCGCCATCCTGTATCA
17	Pyrokinin 2 receptor 1	CG8784	GCTTCCCAGGCGATGTTA	TGACCCGTTGTCGTTCCA
18	Pyrokinin 2 receptor 2	CG8795	AACGGTTCTCACCATCACA	TCGTCCCTGGGCATTTAG
19	Myosuppressin receptor 1	CG8985	ACGGTGACCCTGGCTGTT	GCAAGGTGCTCGCATTTA
20	Allatostatin C receptor 1	CG7285	ATGTCCTCCAGTTTGTGAA	CCAAATAATCCGATAATGC
21	Allatostatin A receptor 1	CG2872	TTCACGGCTACCGATTAC	ACCGACGAGACTCCAGAT
22	CCHamide-1 receptor	CG30106	TGTGCGACAGATGCGAAAT	CGGATACGGATAGCAAATGAC
23	Capability receptor	CG14575	AGCGCGCGATTCGGATAATA	CTCCCATTCGTCCGTAGAGC
24	Diuretic hormone 44 receptor 1	CG8422	ATTCATTACGATAGCAGCAAG	TCCAGAACAAAGCCGACA
25	Ecdysis-triggering hormone receptor	CG5911	TGTGGTGGGCAATGTGAT	GGACGCAGATGAGGATGG
26		CG10738	TTCCCTTCAGTTCGTCGTG	ATCCGTGATGGTAGATGGTATT
27	Neuropeptide F receptor	CG1147	TCGTCTCGGTGGCATACT	CAGATGGCGTAGCGGACT
28	Torso	CG1389	AATCGTTCGGAGGTTCAG	CACTTGGCGTTTCTTGTA
29	Tachykinin-like receptor at 99D	CG7887	GCCTCCACGCTCATCTCCT	TCACCACCCTTCGCTTACT
30	Pyrokinin 1 receptor	CG9918	GCCACGGTGCTAACGATT	CAGGACCCTCCACCAAAG
31	Diuretic hormone 31 Receptor	CG32843	GATGGCTGGCTTTGTTGG	GGCGCACTTCAGGGATTT
32	Corazonin receptor	CG10698	CGGTAATGGCACTGTTCTC	CAATCCGCCGTGTAGAAT

## Sheet: Primers for Figure 7a-b
Line No.	Gene Name	Gene ID	Forward Primer	Reverse Primer
1	GFP		TCGTGACCACCCTGACCTA	TCACCTTGATGCCGTTCTT
2	Tyramine beta hydroxylase	CG1543	GCGATGAGATGTGCGTCAAC	ACAGCGGATTGTAGTTGGGG
3	Dopa decarboxylase	CG10697	GGCACAGTCCCAAGTTTCA	TACTCCGCCCAGAAGACC
4	Transglutaminase	CG7356	TAGCGGATGACACCAAGC	GAATCCTGCCCACCGTAC
5	Tyrosine decarboxylase 2	CG30446	CTCGCTTCCACGCCTATT	GTCGTCGGGCTCCAGAAT
6	Choline acetyltransferase	CG12345	TTCCCTGACACTCTACCCAA	AGCCGAGAACTGCCTGAT
7	Tyrosine hydroxylase	CG10118	GCAGACCAAACAAACCGTCC	AATCCGGGGTGGTTCATGTC
8	Tryptophan hydroxylase	CG9122	GCTGGCCAACTCCAGTTTTG	ATTTGCTCCTTGGCCTCCTC
9	Histidine decarboxylase	CG3454	TGGACGTGGTGGTTCAGA	AAGGAGGCACTGGTCTGG
10	Glutamic acid decarboxylase	CG14994	CTCCAATCTGTATGCCTTCC	CACGCTCAACACCAGTAAAT
