# Supplementary figures and images for: Regulation of starvation-induced hyperactivity by insulin and glucagon signaling in adult Drosophila
Source: eLife journal article supplement (doi:10.7554/elife.15693), 2016-09-09

Figure 6-figure supplement 3

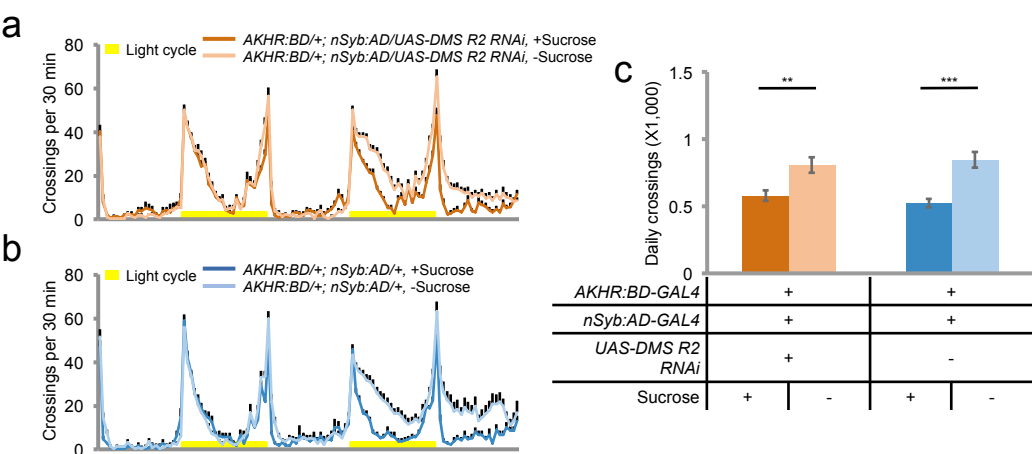

Supplement: supp [file elife-15693-supp-v1.zip]

Figure 5-figure supplement 1

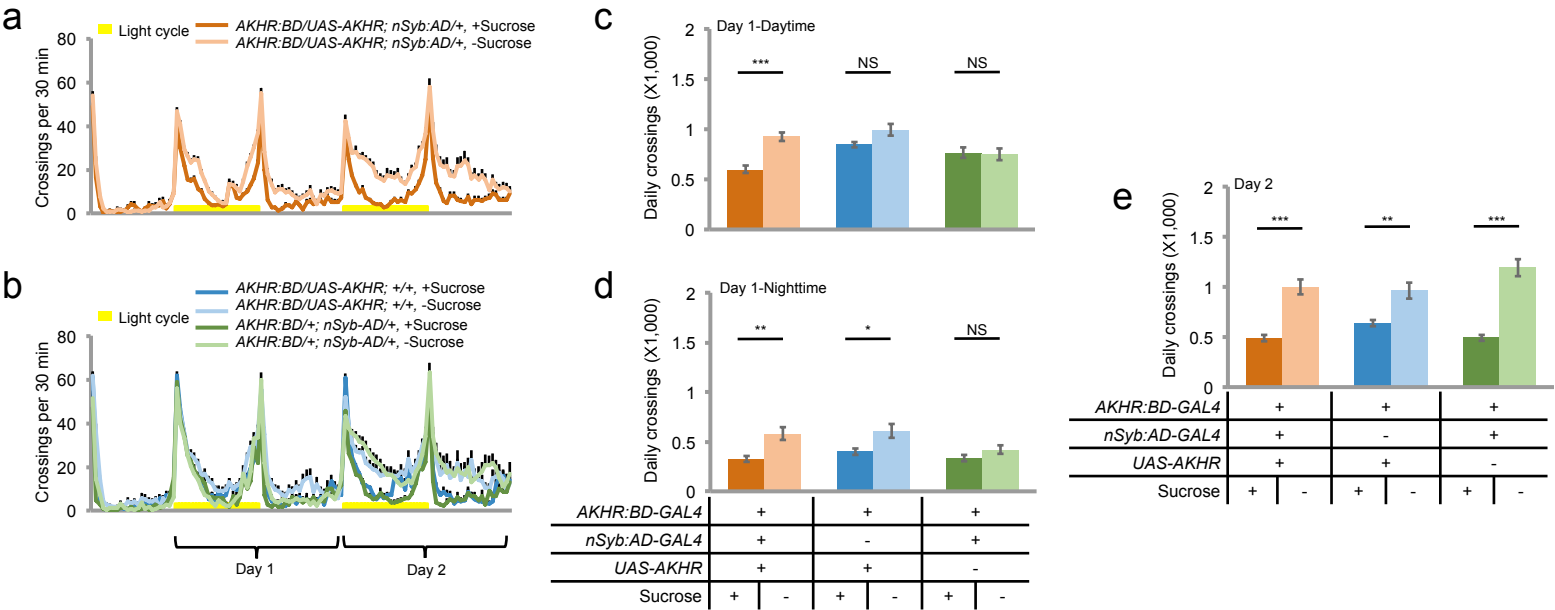

Supplement: supp [file elife-15693-supp-v1.zip]

Figure 6-figure supplement 1

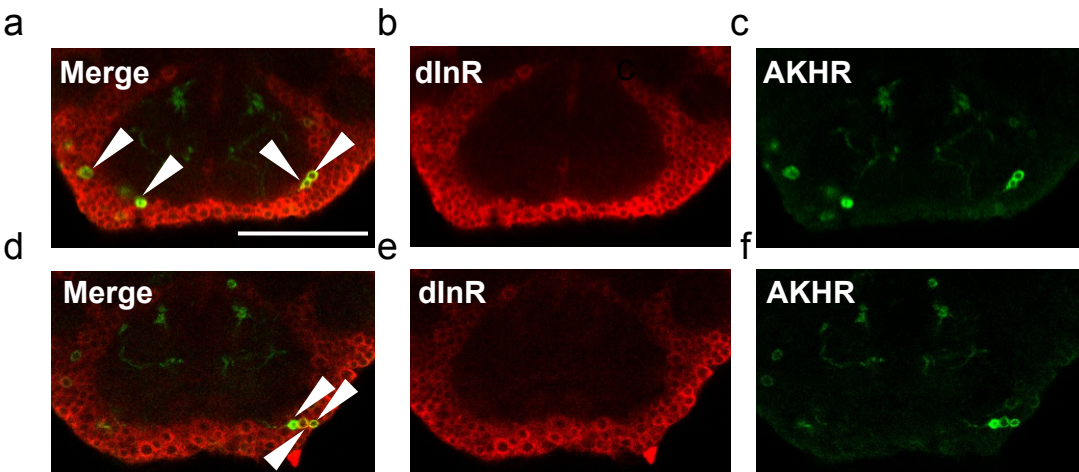

Supplement: supp [file elife-15693-supp-v1.zip]

Figure 7-figure supplement 1

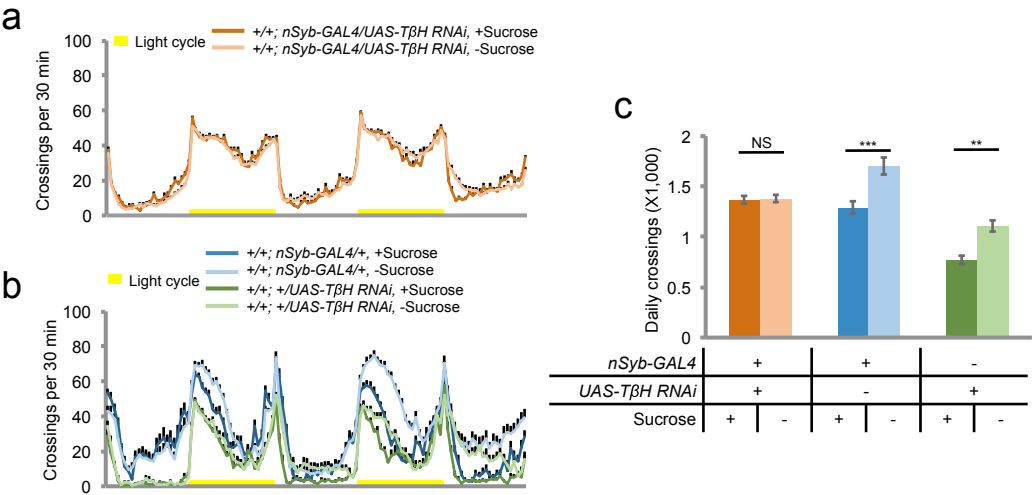

Supplement: supp [file elife-15693-supp-v1.zip]

Figure 3-figure supplement 2

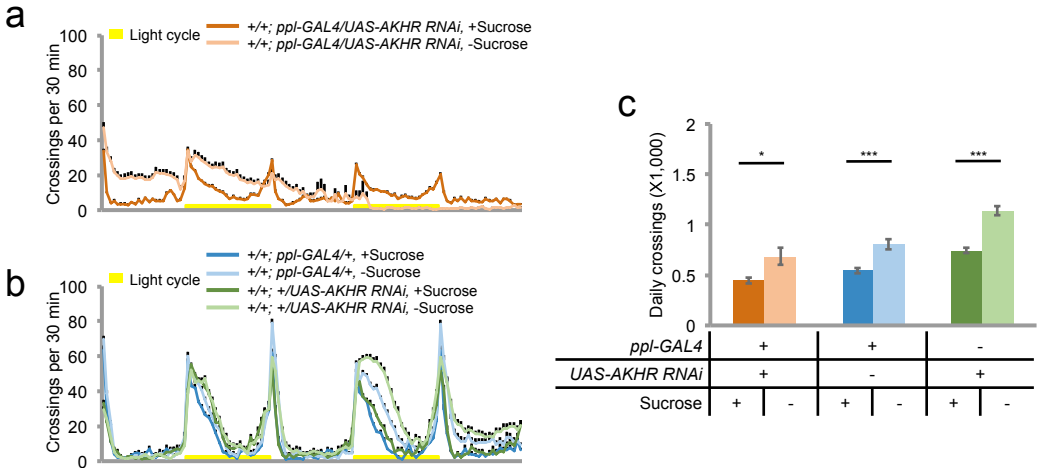

Supplement: supp [file elife-15693-supp-v1.zip]

Figure 3-figure supplement 1

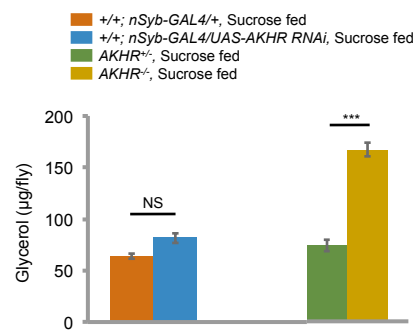

Supplement: supp [file elife-15693-supp-v1.zip]

Figure 6-figure supplement 2

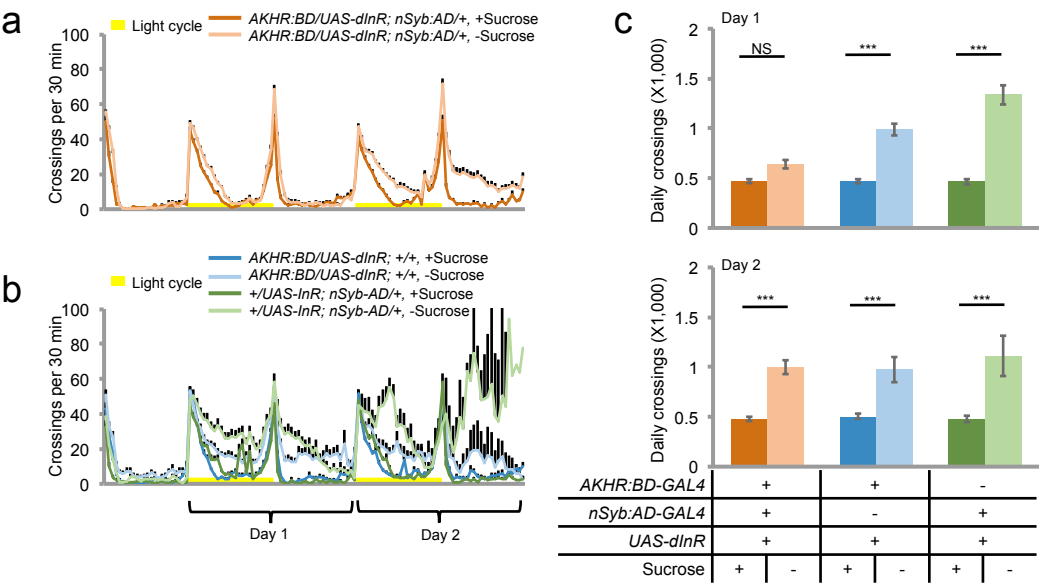

Supplement: supp [file elife-15693-supp-v1.zip]

Figure 4-figure supplement 1

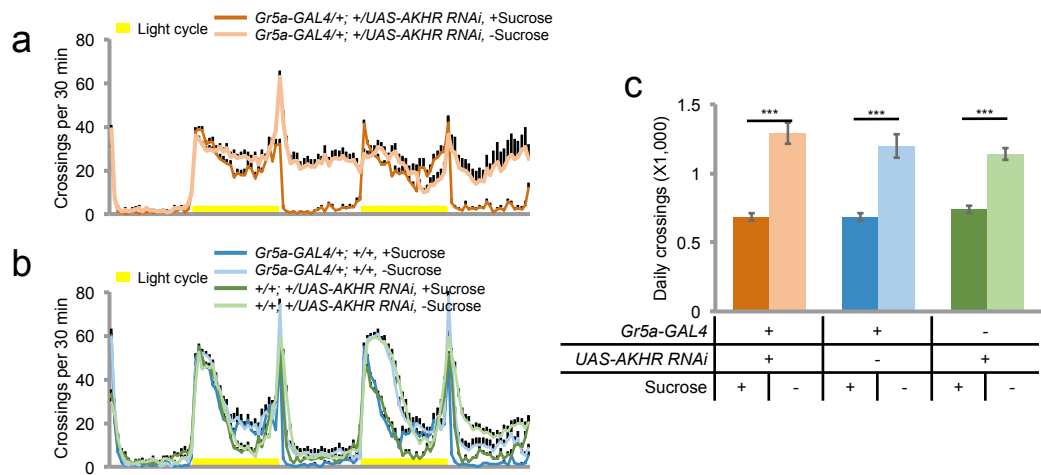

Supplement: supp [file elife-15693-supp-v1.zip]

Figure 3-figure supplement 3

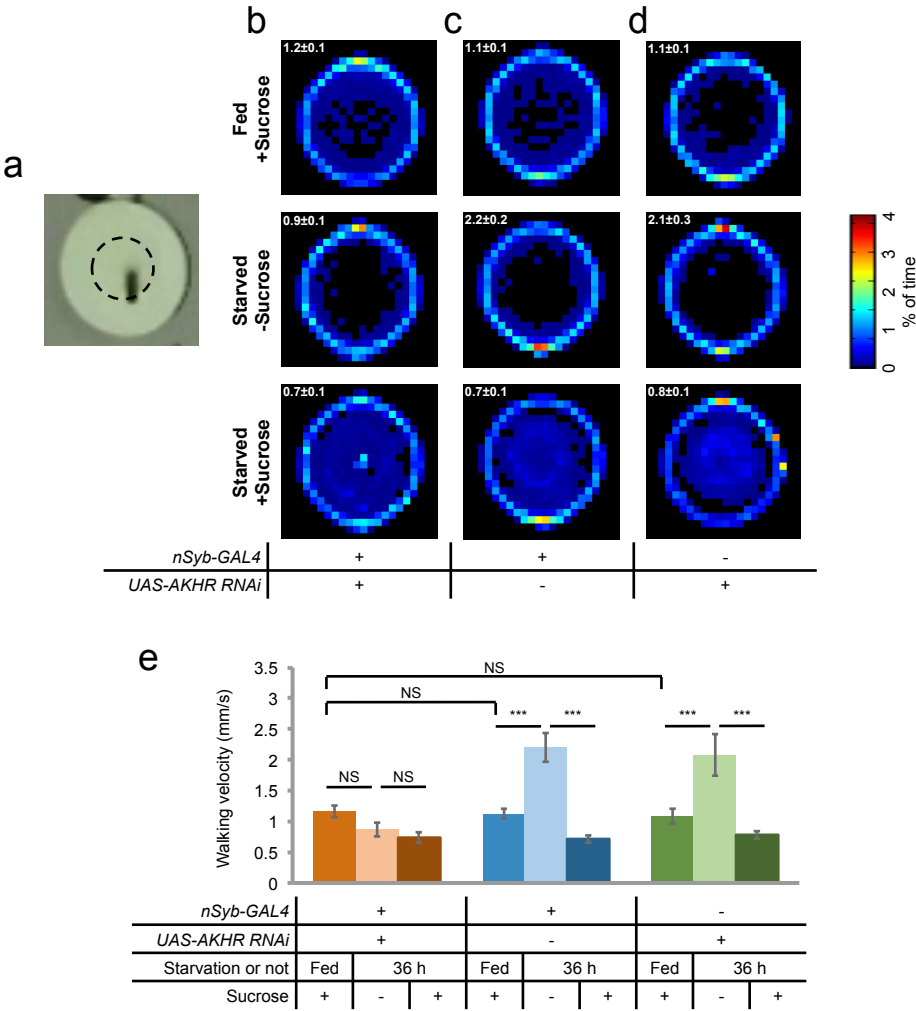

Supplement: supp [file elife-15693-supp-v1.zip]
